# Supplementary material for: Comparison of Treatment with Sitagliptin or Sulfonylurea in Patients with Type 2 Diabetes Mellitus and Mild Renal Impairment: A Post Hoc Analysis of Clinical Trials
Source: Springer Nature journal article supplement (doi:10.1007/s13300-015-0098-y), 2015-01-29
Supplement: MOESM2 [file 9263302]

- Selected measures of efficacy and safety of the dipeptidyl peptidase-4 (DPP-4) inhibitor sitagliptin and sulfonylureas were compared in 1211 patients with mild renal impairment (estimated glomerular filtration rates of 60 to <90 mL/min/1.73 m<sup>2</sup>) using pooled data from three randomized, double-blind clinical trials.
- Glycated hemoglobin (HbA<sub>1c</sub>) and fasting plasma glucose decreased similarly with sitagliptin or sulfonylurea.
- A lower incidence of hypoglycemia was observed with sitagliptin.
- Body weight decreased with sitagliptin but increased with sulfonylurea.
- A greater percentage of subjects treated with sitagliptin (41.1%) than treated with sulfonylurea (16.9%) achieved the composite endpoint of >0.5% HbA<sub>1c</sub> reduction with no symptomatic hypoglycemia or body weight gain.

This summary slide represents the opinions of the authors. Sponsorship for this study was funded by Merck & Co., Inc., Whitehouse Station, NJ, USA. For a full list of acknowledgments and conflicts of interest for all authors of this article, please see the full text online. Copyright © The Authors 2015. Creative Commons Attribution Noncommercial License (CC BY-NC).
